# Supplementary material
Source: Springer Nature journal article supplement (https://www.springermedizin.de/resource/supplementary/12974_2011_384_MOESM6_ESM.pdf/9601554)

## A: cortex cytokine levels

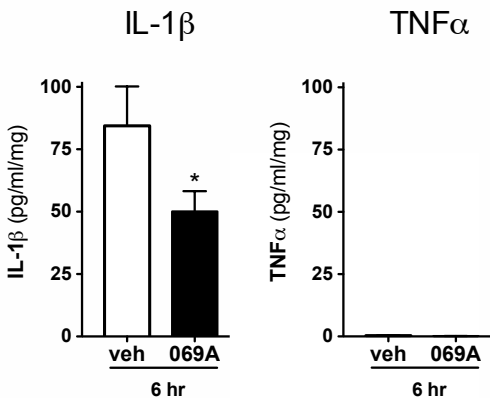

## B: serum cytokine levels

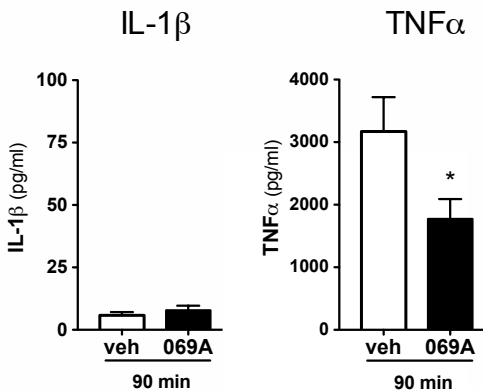

Supplement: MOESM6 [file 9601554]
